# Supplementary material for: Emergence and Genomic Characterization of a spa Type t4407 ST6-SCCmec Type IVa Methicillin-Resistant Staphylococcus aureus Strain Isolated from Al-Karak Hospital, Jordan
Source: MDPI journal article supplement (doi:10.3390/medicina60020295), 2024-02-09
Supplement: s1 [file s1]

## Supplementary Information

# Emergence and Genomic Characterization of a *spa* Type t4407 ST6-SCC<sub>mec</sub> Type IVa Methicillin-Resistant *Staphylococcus aureus* Strain Isolated from Al-Karak Hospital, Jordan

Yasser Gaber <sup>1,2,\*</sup>, Heba M. TumAllah <sup>1</sup>, Nourhan H. AbdelAllah <sup>2,3</sup>, Wael A. Al-Zereini <sup>4</sup>, Mohammad A. Abu-Lubad <sup>5</sup>, Amin A. Aqel <sup>5</sup>, Walid F. Elkhatib <sup>6,7</sup>, Richard V. Goering <sup>8</sup> and Ahmed M. Soliman <sup>9</sup>

<sup>1</sup> Department of Pharmaceutics and Pharmaceutical Technology, Faculty of Pharmacy, Mutah University, Al-Karak 61710, Jordan; heba\_tumallah@yahoo.com

<sup>2</sup> Department of Microbiology and Immunology, Faculty of Pharmacy, Beni-Suef University, Beni-Suef 62511, Egypt; nourhan.hassan@pharm.bsu.edu.eg

<sup>3</sup> Clinical Trials Department, Central Administrative of Biological, Innovative Products and Clinical Trials, Egyptian Drug Authority, Giza 12654, Egypt

<sup>4</sup> Department of Biological Sciences, Faculty of Sciences, Mutah University, Al-Karak 61710, Jordan; wzereini@mutah.edu.jo

<sup>5</sup> Department of Microbiology and Pathology, Faculty of Medicine, Mutah University, Al-Karak 61710, Jordan; abu\_lubbad@mutah.edu.jo (M.A.A.-L.); amina@mutah.edu.jo (A.A.A.)

<sup>6</sup> Microbiology and Immunology Department, Faculty of Pharmacy, Ain Shams University, African Union Organization St., Abbassia, Cairo 11566, Egypt; walid-elkhatib@gu.edu.eg

<sup>7</sup> Department of Microbiology & Immunology, Faculty of Pharmacy, Galala University, New Galala City, Suez 43713, Egypt

<sup>8</sup> Department of Medical Microbiology and Immunology, Creighton University School of Medicine, Omaha, NE 68178, USA; richardgoering@creighton.edu

<sup>9</sup> Department of Microbiology and Immunology, Faculty of Pharmacy, Kafr-Elsheikh University, Kafr El-Sheikh 33516, Egypt; ahmed\_soliman@pharm.kfs.edu.eg

## Subsystem Information

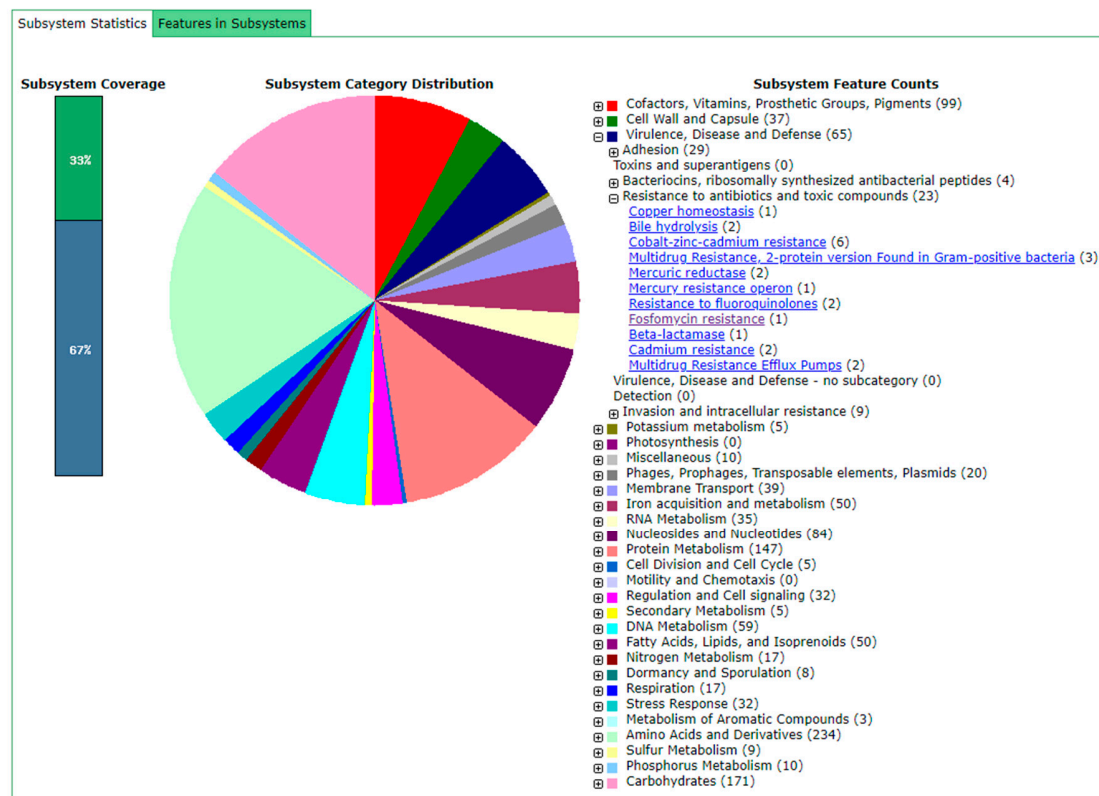

**Figure S1.** Annotation summary for MRSA strain Karak2019-A29 using RAST subsystem

Table S1 Virulence factors detected in A29 genome in the current study based on Virulence factor tool VirulenceFinder-2.0 Server (last accessed 14/1/2024)

| Host immunological genes for <i>S. aureus</i> . |          |                         |                                                                  |                    |                                       |                  |
|-------------------------------------------------|----------|-------------------------|------------------------------------------------------------------|--------------------|---------------------------------------|------------------|
| Virulence factor                                | Identity | Query / Template length | Contig                                                           | Position in contig | Protein function                      | Accession number |
| sak                                             | 100      | 492 / 492               | CP104989.1 Staphylococcus aureus strain Karak2019-A29 chromosome | 2614676..2615167   | staphylokinase                        | BA000017.4       |
| scn                                             | 100      | 351 / 351               | CP104989.1 Staphylococcus aureus strain Karak2019-A29 chromosome | 2616664..2617014   | staphylococcal complement inhibitor   | LC032460.1       |
| Exoenzyme genes for <i>S. aureus</i>            |          |                         |                                                                  |                    |                                       |                  |
| Virulence factor                                | Identity | Query / Template length | Contig                                                           | Position in contig | Protein function                      | Accession number |
| aur                                             | 99.87    | 1530 / 1530             | CP104989.1 Staphylococcus aureus strain Karak2019-A29 chromosome | 145284..146813     | aureolysin                            | AP014653.1       |
| splA                                            | 99.86    | 708 / 708               | CP104989.1 Staphylococcus aureus strain Karak2019-A29 chromosome | 1122500..1123207   | serine protease splA                  | AP014942.1       |
| splB                                            | 99.72    | 723 / 723               | CP104989.1 Staphylococcus aureus strain Karak2019-A29 chromosome | 1123332..1124054   | serine protease splB                  | AP014942.1       |
| splE                                            | 100      | 717 / 717               | CP104989.1 Staphylococcus aureus strain Karak2019-A29 chromosome | 1125829..1126545   | serine protease splE                  | AP009351.1       |
| Toxin genes for <i>S. aureus</i>                |          |                         |                                                                  |                    |                                       |                  |
| Virulence factor                                | Identity | Query / Template length | Contig                                                           | Position in contig | Protein function                      | Accession number |
| hlgA                                            | 100      | 930 / 930               | CP104989.1 Staphylococcus aureus strain Karak2019-A29 chromosome | 1345141..1346070   | gamma-hemolysin chain II precursor    | AP014942.1       |
| hlgB                                            | 99.8     | 977 / 977               | CP104989.1 Staphylococcus aureus strain Karak2019-A29 chromosome | 1342648..1343624   | gamma-hemolysin component B precursor | BA000033.2       |
| hlgC                                            | 99.89    | 948 / 948               | CP104989.1 Staphylococcus aureus strain Karak2019-A29 chromosome | 1343626..1344573   | gamma-hemolysin component C           | AP014653.1       |
| lukD                                            | 99.69    | 983 / 984               | CP104989.1 Staphylococcus aureus strain Karak2019-A29 chromosome | 1110128..1111110   | leukocidin D component                | AP014653.1       |
| lukE                                            | 99.79    | 936 / 936               | CP104989.1 Staphylococcus aureus strain Karak2019-A29 chromosome | 1109191..1110126   | leukocidin E component                | AP014942.1       |

|     |     |           |                                                                  |                  |               |            |
|-----|-----|-----------|------------------------------------------------------------------|------------------|---------------|------------|
| sea | 100 | 783 / 783 | CP104989.1 Staphylococcus aureus strain Karak2019-A29 chromosome | 2612185..2612967 | enterotoxin A | AP009324.1 |
|-----|-----|-----------|------------------------------------------------------------------|------------------|---------------|------------|

Table S2 SNP analysis of the A29 genome mapped to the antimicrobial resistance genes in CP047022.1 genome (Danish MRSA isolate)

| Entry number | Start/Stop/SNP ( Numbering according to CP047022.1 , the Danish isolate genome) | start/stop | Strand | Danish isolate | SNP detected in A29 genome | Element symbol | Element name                                       | Type   | Scope | Subtype | Class       | Subclass    | Method  | % Coverage of reference | % Identity to reference |
|--------------|---------------------------------------------------------------------------------|------------|--------|----------------|----------------------------|----------------|----------------------------------------------------|--------|-------|---------|-------------|-------------|---------|-------------------------|-------------------------|
| 1            | 3448                                                                            | Start      | +      |                |                            | cadD           | cadmium resistance transporter CadD                | STRESS | plus  | METAL   | CADMIUM     | CADMIUM     | BLAST P | 100                     | 99.51                   |
| 2            | 4065                                                                            | stop       | +      |                |                            | cadD           | cadmium resistance transporter CadD                | STRESS | plus  | METAL   | CADMIUM     | CADMIUM     | BLAST P | 100                     | 99.51                   |
| 3            | 8476                                                                            | Start      | -      |                |                            | blaR1          | beta-lactam sensor/signal transducer BlaR1         | AMR    | core  | AMR     | BETA-LACTAM | BETA-LACTAM | BLAST P | 100                     | 95.56                   |
| 4            | 10233                                                                           | stop       | -      |                |                            | blaR1          | beta-lactam sensor/signal transducer BlaR1         | AMR    | core  | AMR     | BETA-LACTAM | BETA-LACTAM | BLAST P | 100                     | 95.56                   |
| 5            | 10340                                                                           | Start      | +      |                |                            | blaZ           | penicillin-hydrolyzing class A beta-lactamase BlaZ | AMR    | core  | AMR     | BETA-LACTAM | BETA-LACTAM | EXACT P | 100                     | 100                     |
| 6            | 11185                                                                           | stop       | +      |                |                            | blaZ           | penicillin-hydrolyzing class A beta-lactamase BlaZ | AMR    | core  | AMR     | BETA-LACTAM | BETA-LACTAM | EXACT P | 100                     | 100                     |

| Entry number | Start/Stop/SNP ( Numbering according to CP047022.1 , the Danish isolate genome | start/stop        | Strand | Danish isolate | SNP detected in A29 genome | Element symbol | Element name                                                         | Type | Scope | Subtype | Class       | Subclass    | Method    | % Coverage of reference | % Identity to reference |
|--------------|--------------------------------------------------------------------------------|-------------------|--------|----------------|----------------------------|----------------|----------------------------------------------------------------------|------|-------|---------|-------------|-------------|-----------|-------------------------|-------------------------|
| 7            | 39653                                                                          | Start             | -      |                |                            | mecA           | PBP2a family beta-lactam-resistant peptidoglycan transpeptidase MecA | AMR  | core  | AMR     | BETA-LACTAM | METHICILLIN | EXACT P   | 100                     | 100                     |
| 8            | 41662                                                                          | stop              | -      |                |                            | mecA           | PBP2a family beta-lactam-resistant peptidoglycan transpeptidase MecA | AMR  | core  | AMR     | BETA-LACTAM | METHICILLIN | EXACT P   | 100                     | 100                     |
| 9            | 41759                                                                          | Start             | +      |                |                            | mecR1          | beta-lactam sensor/signal transducer MecR1                           | AMR  | core  | AMR     | BETA-LACTAM | METHICILLIN | PARTIAL P | 55.56                   | 100                     |
| 10           | 42745                                                                          | stop              | +      |                |                            | mecR1          | beta-lactam sensor/signal transducer MecR1                           | AMR  | core  | AMR     | BETA-LACTAM | METHICILLIN | PARTIAL P | 55.56                   | 100                     |
| 11           | 61423                                                                          | SNP in A29 genome |        | C              | T                          |                |                                                                      |      |       |         |             |             |           |                         |                         |
| 12           | 87285                                                                          | SNP in            |        | C              | T                          |                |                                                                      |      |       |         |             |             |           |                         |                         |

| Entry number | Start/Stop/SNP ( Numbering according to CP047022.1 , the Danish isolate genome | start/stop        | Strand | Danish isolate | SNP detected in A29 genome | Element symbol | Element name                                | Type | Scope | Subtype | Class        | Subclass     | Method  | % Coverage of reference | % Identity to reference |
|--------------|--------------------------------------------------------------------------------|-------------------|--------|----------------|----------------------------|----------------|---------------------------------------------|------|-------|---------|--------------|--------------|---------|-------------------------|-------------------------|
|              |                                                                                | A29 genome        |        |                |                            |                |                                             |      |       |         |              |              |         |                         |                         |
| 13           | 117202                                                                         | SNP in A29 genome |        | G              | T                          |                |                                             |      |       |         |              |              |         |                         |                         |
| 14           | 122824                                                                         | Start             | +      |                |                            | tet(38)        | tetracycline efflux MFS transporter Tet(38) | AMR  | core  | AMR     | TETRACYCLINE | TETRACYCLINE | EXACT P | 100                     | 100                     |
| 15           | 124176                                                                         | stop              | +      |                |                            | tet(38)        | tetracycline efflux MFS transporter Tet(38) | AMR  | core  | AMR     | TETRACYCLINE | TETRACYCLINE | EXACT P | 100                     | 100                     |
| 16           | 129576                                                                         | SNP in A29 genome |        | G              | A                          |                |                                             |      |       |         |              |              |         |                         |                         |
| 17           | 195444                                                                         | SNP in A29 genome |        | C              | T                          |                |                                             |      |       |         |              |              |         |                         |                         |

| Entry number | Start/Stop/SNP ( Numbering according to CP047022.1 , the Danish isolate genome | start/stop        | Strand | Danish isolate | SNP detected in A29 genome | Element symbol | Element name | Type | Scope | Subtype | Class | Subclass | Method | % Coverage of reference | % Identity to reference |
|--------------|--------------------------------------------------------------------------------|-------------------|--------|----------------|----------------------------|----------------|--------------|------|-------|---------|-------|----------|--------|-------------------------|-------------------------|
| 18           | 20279<br>2                                                                     | SNP in A29 genome |        | T              | G                          |                |              |      |       |         |       |          |        |                         |                         |
| 19           | 20613<br>3                                                                     | SNP in A29 genome |        | A              | C                          |                |              |      |       |         |       |          |        |                         |                         |
| 20           | 21999<br>3                                                                     | SNP in A29 genome |        | G              | T                          |                |              |      |       |         |       |          |        |                         |                         |
| 21           | 26496<br>4                                                                     | SNP in A29 genome |        | A              | G                          |                |              |      |       |         |       |          |        |                         |                         |
| 22           | 27390<br>8                                                                     | SNP in A29 genome |        | C              | T                          |                |              |      |       |         |       |          |        |                         |                         |
| 23           | 29716<br>2                                                                     | SNP in            |        | G              | T                          |                |              |      |       |         |       |          |        |                         |                         |



| Entry number | Start/Stop/SNP ( Numbering according to CP047022.1 , the Danish isolate genome | start/stop        | Strand | Danish isolate | SNP detected in A29 genome | Element symbol | Element name                            | Type      | Scope | Subtype   | Class        | Subclass    | Method  | % Coverage of reference | % Identity to reference |
|--------------|--------------------------------------------------------------------------------|-------------------|--------|----------------|----------------------------|----------------|-----------------------------------------|-----------|-------|-----------|--------------|-------------|---------|-------------------------|-------------------------|
|              |                                                                                | A29 genome        |        |                |                            |                |                                         |           |       |           |              |             |         |                         |                         |
| 24           | 351426                                                                         | Start             | +      |                |                            | mepA           | multidrug efflux MATE transporter MepA  | AMR       | plus  | AMR       | TETRACYCLINE | TIGECYCLINE | BLAST P | 100                     | 99.33                   |
| 25           | 352781                                                                         | stop              | +      |                |                            | mepA           | multidrug efflux MATE transporter MepA  | AMR       | plus  | AMR       | TETRACYCLINE | TIGECYCLINE | BLAST P | 100                     | 99.33                   |
| 26           | 385926                                                                         | Start             | +      |                |                            | selX           | staphylococcal enterotoxin-like toxin X | VIRULENCE | plus  | VIRULENCE |              |             | BLAST P | 100                     | 96.06                   |
| 27           | 386537                                                                         | stop              | +      |                |                            | selX           | staphylococcal enterotoxin-like toxin X | VIRULENCE | plus  | VIRULENCE |              |             | BLAST P | 100                     | 96.06                   |
| 28           | 405800                                                                         | SNP in A29 genome |        | C              | T                          |                |                                         |           |       |           |              |             |         |                         |                         |
| 29           | 433226                                                                         | SNP in A29 genome |        | A              | T                          |                |                                         |           |       |           |              |             |         |                         |                         |

| Entry number | Start/Stop/SNP ( Numbering according to CP047022.1 , the Danish isolate genome | start/stop        | Strand | Danish isolate | SNP detected in A29 genome | Element symbol | Element name | Type | Scope | Subtype | Class | Subclass | Method | % Coverage of reference | % Identity to reference |
|--------------|--------------------------------------------------------------------------------|-------------------|--------|----------------|----------------------------|----------------|--------------|------|-------|---------|-------|----------|--------|-------------------------|-------------------------|
| 30           | 459607                                                                         | SNP in A29 genome |        | C              | T                          |                |              |      |       |         |       |          |        |                         |                         |
| 31           | 466745                                                                         | SNP in A29 genome |        | A              | G                          |                |              |      |       |         |       |          |        |                         |                         |
| 32           | 471086                                                                         | SNP in A29 genome |        | A              | G                          |                |              |      |       |         |       |          |        |                         |                         |
| 33           | 478280                                                                         | SNP in A29 genome |        | A              | G                          |                |              |      |       |         |       |          |        |                         |                         |
| 34           | 496834                                                                         | SNP in A29 genome |        | T              | A                          |                |              |      |       |         |       |          |        |                         |                         |
| 35           | 557684                                                                         | SNP in            |        | A              | G                          |                |              |      |       |         |       |          |        |                         |                         |

| Entry number | Start/Stop/SNP ( Numbering according to CP047022.1 , the Danish isolate genome | start/stop        | Strand | Danish isolate | SNP detected in A29 genome | Element symbol | Element name | Type | Scope | Subtype | Class | Subclass | Method | % Coverage of reference | % Identity to reference |
|--------------|--------------------------------------------------------------------------------|-------------------|--------|----------------|----------------------------|----------------|--------------|------|-------|---------|-------|----------|--------|-------------------------|-------------------------|
|              |                                                                                | A29 genome        |        |                |                            |                |              |      |       |         |       |          |        |                         |                         |
| 36           | 594282                                                                         | SNP in A29 genome |        | G              | A                          |                |              |      |       |         |       |          |        |                         |                         |
| 37           | 596571                                                                         | SNP in A29 genome |        | T              | C                          |                |              |      |       |         |       |          |        |                         |                         |
| 38           | 623798                                                                         | SNP in A29 genome |        | G              | A                          |                |              |      |       |         |       |          |        |                         |                         |
| 39           | 651961                                                                         | SNP in A29 genome |        | C              | T                          |                |              |      |       |         |       |          |        |                         |                         |
| 40           | 788178                                                                         | SNP in A29        |        | G              | T                          |                |              |      |       |         |       |          |        |                         |                         |

| Entry number | Start/Stop/SNP ( Numbering according to CP047022.1 , the Danish isolate genome | start/stop        | Strand | Danish isolate | SNP detected in A29 genome | Element symbol | Element name | Type | Scope | Subtype | Class | Subclass | Method | % Coverage of reference | % Identity to reference |
|--------------|--------------------------------------------------------------------------------|-------------------|--------|----------------|----------------------------|----------------|--------------|------|-------|---------|-------|----------|--------|-------------------------|-------------------------|
|              |                                                                                | genome            |        |                |                            |                |              |      |       |         |       |          |        |                         |                         |
| 41           | 824558                                                                         | SNP in A29 genome |        | A              | T                          |                |              |      |       |         |       |          |        |                         |                         |
| 42           | 827178                                                                         | SNP in A29 genome |        | A              | G                          |                |              |      |       |         |       |          |        |                         |                         |
| 43           | 847296                                                                         | SNP in A29 genome |        | G              | A                          |                |              |      |       |         |       |          |        |                         |                         |
| 44           | 848111                                                                         | SNP in A29 genome |        | A              | G                          |                |              |      |       |         |       |          |        |                         |                         |
| 45           | 862366                                                                         | SNP in A29 genome |        | G              | A                          |                |              |      |       |         |       |          |        |                         |                         |

| Entry number | Start/Stop/SNP ( Numbering according to CP047022.1 , the Danish isolate genome | start/stop        | Strand | Danish isolate | SNP detected in A29 genome | Element symbol | Element name | Type | Scope | Subtype | Class | Subclass | Method | % Coverage of reference | % Identity to reference |
|--------------|--------------------------------------------------------------------------------|-------------------|--------|----------------|----------------------------|----------------|--------------|------|-------|---------|-------|----------|--------|-------------------------|-------------------------|
| 46           | 1003956                                                                        | SNP in A29 genome |        | A              | G                          |                |              |      |       |         |       |          |        |                         |                         |
| 47           | 1008726                                                                        | SNP in A29 genome |        | T              | C                          |                |              |      |       |         |       |          |        |                         |                         |
| 48           | 1052634                                                                        | SNP in A29 genome |        | A              | C                          |                |              |      |       |         |       |          |        |                         |                         |
| 49           | 1055966                                                                        | SNP in A29 genome |        | C              | T                          |                |              |      |       |         |       |          |        |                         |                         |
| 50           | 1079677                                                                        | SNP in A29 genome |        | A              | G                          |                |              |      |       |         |       |          |        |                         |                         |
| 51           | 1094915                                                                        | SNP in            |        | C              | T                          |                |              |      |       |         |       |          |        |                         |                         |

| Entry number | Start/Stop/SNP ( Numbering according to CP047022.1 , the Danish isolate genome | start/stop        | Strand | Danish isolate | SNP detected in A29 genome | Element symbol | Element name | Type | Scope | Subtype | Class | Subclass | Method | % Coverage of reference | % Identity to reference |
|--------------|--------------------------------------------------------------------------------|-------------------|--------|----------------|----------------------------|----------------|--------------|------|-------|---------|-------|----------|--------|-------------------------|-------------------------|
|              |                                                                                | A29 genome        |        |                |                            |                |              |      |       |         |       |          |        |                         |                         |
| 52           | 1096368                                                                        | SNP in A29 genome |        | C              | A                          |                |              |      |       |         |       |          |        |                         |                         |
| 53           | 1100800                                                                        | SNP in A29 genome |        | A              | G                          |                |              |      |       |         |       |          |        |                         |                         |
| 54           | 1169946                                                                        | SNP in A29 genome |        | T              | C                          |                |              |      |       |         |       |          |        |                         |                         |
| 55           | 1265315                                                                        | SNP in A29 genome |        | C              | T                          |                |              |      |       |         |       |          |        |                         |                         |
| 56           | 1304832                                                                        | SNP in A29        |        | A              | G                          |                |              |      |       |         |       |          |        |                         |                         |

| Entry number | Start/Stop/SNP ( Numbering according to CP047022.1 , the Danish isolate genome | start/stop        | Strand | Danish isolate | SNP detected in A29 genome | Element symbol | Element name | Type | Scope | Subtype | Class | Subclass | Method | % Coverage of reference | % Identity to reference |
|--------------|--------------------------------------------------------------------------------|-------------------|--------|----------------|----------------------------|----------------|--------------|------|-------|---------|-------|----------|--------|-------------------------|-------------------------|
|              |                                                                                | genome            |        |                |                            |                |              |      |       |         |       |          |        |                         |                         |
| 57           | 1313113                                                                        | SNP in A29 genome |        | T              | C                          |                |              |      |       |         |       |          |        |                         |                         |
| 58           | 1337775                                                                        | SNP in A29 genome |        | G              | A                          |                |              |      |       |         |       |          |        |                         |                         |
| 59           | 1348357                                                                        | SNP in A29 genome |        | T              | A                          |                |              |      |       |         |       |          |        |                         |                         |
| 60           | 1358333                                                                        | SNP in A29 genome |        | A              | G                          |                |              |      |       |         |       |          |        |                         |                         |
| 61           | 1363484                                                                        | SNP in A29 genome |        | C              | T                          |                |              |      |       |         |       |          |        |                         |                         |

| Entry number | Start/Stop/SNP ( Numbering according to CP047022.1 , the Danish isolate genome | start/stop        | Strand | Danish isolate | SNP detected in A29 genome | Element symbol | Element name | Type | Scope | Subtype | Class | Subclass | Method | % Coverage of reference | % Identity to reference |
|--------------|--------------------------------------------------------------------------------|-------------------|--------|----------------|----------------------------|----------------|--------------|------|-------|---------|-------|----------|--------|-------------------------|-------------------------|
| 62           | 1377084                                                                        | SNP in A29 genome |        | C              | T                          |                |              |      |       |         |       |          |        |                         |                         |
| 63           | 1410891                                                                        | SNP in A29 genome |        | T              | C                          |                |              |      |       |         |       |          |        |                         |                         |
| 64           | 1492314                                                                        | SNP in A29 genome |        | T              | C                          |                |              |      |       |         |       |          |        |                         |                         |
| 65           | 1494830                                                                        | SNP in A29 genome |        | C              | T                          |                |              |      |       |         |       |          |        |                         |                         |
| 66           | 1502240                                                                        | SNP in A29 genome |        | A              | G                          |                |              |      |       |         |       |          |        |                         |                         |
| 67           | 1510094                                                                        | SNP in            |        | C              | T                          |                |              |      |       |         |       |          |        |                         |                         |



| Entry number | Start/Stop/SNP ( Numbering according to CP047022.1 , the Danish isolate genome | start/stop        | Strand | Danish isolate | SNP detected in A29 genome | Element symbol | Element name | Type | Scope | Subtype | Class | Subclass | Method | % Coverage of reference | % Identity to reference |
|--------------|--------------------------------------------------------------------------------|-------------------|--------|----------------|----------------------------|----------------|--------------|------|-------|---------|-------|----------|--------|-------------------------|-------------------------|
|              |                                                                                | A29 genome        |        |                |                            |                |              |      |       |         |       |          |        |                         |                         |
| 68           | 1536586                                                                        | SNP in A29 genome |        | T              | A                          |                |              |      |       |         |       |          |        |                         |                         |
| 69           | 1555615                                                                        | SNP in A29 genome |        | T              | C                          |                |              |      |       |         |       |          |        |                         |                         |
| 70           | 1565266                                                                        | SNP in A29 genome |        | C              | T                          |                |              |      |       |         |       |          |        |                         |                         |
| 71           | 1585617                                                                        | SNP in A29 genome |        | T              | C                          |                |              |      |       |         |       |          |        |                         |                         |
| 72           | 1616832                                                                        | SNP in A29        |        | A              | T                          |                |              |      |       |         |       |          |        |                         |                         |

| Entry number | Start/Stop/SNP ( Numbering according to CP047022.1 , the Danish isolate genome | start/stop        | Strand | Danish isolate | SNP detected in A29 genome | Element symbol | Element name | Type | Scope | Subtype | Class | Subclass | Method | % Coverage of reference | % Identity to reference |
|--------------|--------------------------------------------------------------------------------|-------------------|--------|----------------|----------------------------|----------------|--------------|------|-------|---------|-------|----------|--------|-------------------------|-------------------------|
|              |                                                                                | genome            |        |                |                            |                |              |      |       |         |       |          |        |                         |                         |
| 73           | 1632012                                                                        | SNP in A29 genome |        | A              | G                          |                |              |      |       |         |       |          |        |                         |                         |
| 74           | 1638378                                                                        | SNP in A29 genome |        | T              | A                          |                |              |      |       |         |       |          |        |                         |                         |
| 75           | 1642194                                                                        | SNP in A29 genome |        | T              | C                          |                |              |      |       |         |       |          |        |                         |                         |
| 76           | 1651495                                                                        | SNP in A29 genome |        | C              | T                          |                |              |      |       |         |       |          |        |                         |                         |
| 77           | 1746100                                                                        | SNP in A29 genome |        | T              | C                          |                |              |      |       |         |       |          |        |                         |                         |

| Entry number | Start/Stop/SNP ( Numbering according to CP047022.1 , the Danish isolate genome | start/stop        | Strand | Danish isolate | SNP detected in A29 genome | Element symbol | Element name                                      | Type      | Scope | Subtype   | Class   | Subclass | Method | % Coverage of reference | % Identity to reference |
|--------------|--------------------------------------------------------------------------------|-------------------|--------|----------------|----------------------------|----------------|---------------------------------------------------|-----------|-------|-----------|---------|----------|--------|-------------------------|-------------------------|
| 78           | 1746407                                                                        | SNP in A29 genome |        | G              | A                          |                |                                                   |           |       |           |         |          |        |                         |                         |
| 79           | 1764608                                                                        | SNP in A29 genome |        | A              | G                          |                |                                                   |           |       |           |         |          |        |                         |                         |
| 80           | 1778611                                                                        | SNP in A29 genome |        | A              | T                          |                |                                                   |           |       |           |         |          |        |                         |                         |
| 81           | 1796127                                                                        | Start             | +      |                |                            | arsB           | arsenite efflux transporter membrane subunit ArsB | STRESS    | plus  | METAL     | ARSENIC | ARSENITE | HMM    | 100                     | 81.82                   |
| 82           | 1797419                                                                        | stop              | +      |                |                            | arsB           | arsenite efflux transporter membrane subunit ArsB | STRESS    | plus  | METAL     | ARSENIC | ARSENITE | HMM    | 100                     | 81.82                   |
| 83           | 1832210                                                                        | Start             | -      |                |                            | spIE           | serine protease SplE                              | VIRULENCE | plus  | VIRULENCE |         |          | EXACTP | 100                     | 100                     |
| 84           | 1832926                                                                        | stop              | -      |                |                            | spIE           | serine protease SplE                              | VIRULENCE | plus  | VIRULENCE |         |          | EXACTP | 100                     | 100                     |

| Entry number | Start/Stop/SNP ( Numbering according to CP047022.1 , the Danish isolate genome | start/stop        | Strand | Danish isolate | SNP detected in A29 genome | Element symbol | Element name                            | Type       | Scope | Subtype    | Class | Subclass | Method  | % Coverage of reference | % Identity to reference |
|--------------|--------------------------------------------------------------------------------|-------------------|--------|----------------|----------------------------|----------------|-----------------------------------------|------------|-------|------------|-------|----------|---------|-------------------------|-------------------------|
| 85           | 1834701                                                                        | Start             | -      |                |                            | splB           | serine protease SplB                    | VIRULE NCE | plus  | VIRULE NCE |       |          | BLAST P | 100                     | 99.58                   |
| 86           | 1835423                                                                        | stop              | -      |                |                            | splB           | serine protease SplB                    | VIRULE NCE | plus  | VIRULE NCE |       |          | BLAST P | 100                     | 99.58                   |
| 87           | 1835548                                                                        | Start             | -      |                |                            | splA           | serine protease SplA                    | VIRULE NCE | plus  | VIRULE NCE |       |          | EXACT P | 100                     | 100                     |
| 88           | 1836255                                                                        | stop              | -      |                |                            | splA           | serine protease SplA                    | VIRULE NCE | plus  | VIRULE NCE |       |          | EXACT P | 100                     | 100                     |
| 89           | 1848629                                                                        | Start             | -      |                |                            | lukE           | bi-component leukocidin LukED subunit E | VIRULE NCE | plus  | VIRULE NCE |       |          | BLAST P | 100                     | 99.68                   |
| 90           | 1849564                                                                        | stop              | -      |                |                            | lukE           | bi-component leukocidin LukED subunit E | VIRULE NCE | plus  | VIRULE NCE |       |          | BLAST P | 100                     | 99.68                   |
| 91           | 1869476                                                                        | SNP in A29 genome |        | C              | T                          |                |                                         |            |       |            |       |          |         |                         |                         |
| 92           | 1884962                                                                        | SNP in A29 genome |        | T              | C                          |                |                                         |            |       |            |       |          |         |                         |                         |

| Entry number | Start/Stop/SNP ( Numbering according to CP047022.1 , the Danish isolate genome | start/stop        | Strand | Danish isolate | SNP detected in A29 genome | Element symbol | Element name | Type | Scope | Subtype | Class | Subclass | Method | % Coverage of reference | % Identity to reference |
|--------------|--------------------------------------------------------------------------------|-------------------|--------|----------------|----------------------------|----------------|--------------|------|-------|---------|-------|----------|--------|-------------------------|-------------------------|
| 93           | 1894879                                                                        | SNP in A29 genome |        | A              | G                          |                |              |      |       |         |       |          |        |                         |                         |
| 94           | 1899804                                                                        | SNP in A29 genome |        | T              | A                          |                |              |      |       |         |       |          |        |                         |                         |
| 95           | 1922068                                                                        | SNP in A29 genome |        | C              | G                          |                |              |      |       |         |       |          |        |                         |                         |
| 96           | 1965750                                                                        | SNP in A29 genome |        | G              | A                          |                |              |      |       |         |       |          |        |                         |                         |
| 97           | 2013482                                                                        | SNP in A29 genome |        | G              | A                          |                |              |      |       |         |       |          |        |                         |                         |

| Entry number | Start/Stop/SNP ( Numbering according to CP047022.1 , the Danish isolate genome | start/stop        | Strand | Danish isolate | SNP detected in A29 genome | Element symbol | Element name                      | Type      | Scope | Subtype   | Class | Subclass | Method | % Coverage of reference | % Identity to reference |
|--------------|--------------------------------------------------------------------------------|-------------------|--------|----------------|----------------------------|----------------|-----------------------------------|-----------|-------|-----------|-------|----------|--------|-------------------------|-------------------------|
| 98           | 2019010                                                                        | Start             | -      |                |                            | scn            | complement inhibitor SCIN-A       | VIRULENCE | plus  | VIRULENCE |       |          | EXACTP | 100                     | 100                     |
| 99           | 2019360                                                                        | stop              | -      |                |                            | scn            | complement inhibitor SCIN-A       | VIRULENCE | plus  | VIRULENCE |       |          | EXACTP | 100                     | 100                     |
| 100          | 2020858                                                                        | Start             | -      |                |                            | sak            | staphylokinase                    | VIRULENCE | plus  | VIRULENCE |       |          | EXACTP | 100                     | 100                     |
| 101          | 2021349                                                                        | stop              | -      |                |                            | sak            | staphylokinase                    | VIRULENCE | plus  | VIRULENCE |       |          | EXACTP | 100                     | 100                     |
| 102          | 2023058                                                                        | Start             | -      |                |                            | sea            | staphylococcal enterotoxin type A | VIRULENCE | plus  | VIRULENCE |       |          | EXACTP | 100                     | 100                     |
| 103          | 2023831                                                                        | stop              | -      |                |                            | sea            | staphylococcal enterotoxin type A | VIRULENCE | plus  | VIRULENCE |       |          | EXACTP | 100                     | 100                     |
| 104          | 2028986                                                                        | SNP in A29 genome |        | G              | A                          |                |                                   |           |       |           |       |          |        |                         |                         |
| 105          | 2077435                                                                        | Start             | -      |                |                            | hld            | delta-hemolysin                   | VIRULENCE | plus  | VIRULENCE |       |          | EXACTP | 100                     | 100                     |
| 106          | 2077569                                                                        | stop              | -      |                |                            | hld            | delta-hemolysin                   | VIRULENCE | plus  | VIRULENCE |       |          | EXACTP | 100                     | 100                     |
| 107          | 2116396                                                                        | SNP in            |        | T              | C                          |                |                                   |           |       |           |       |          |        |                         |                         |

| Entry number | Start/Stop/SNP ( Numbering according to CP047022.1 , the Danish isolate genome | start/stop        | Strand | Danish isolate | SNP detected in A29 genome | Element symbol | Element name | Type | Scope | Subtype | Class | Subclass | Method | % Coverage of reference | % Identity to reference |
|--------------|--------------------------------------------------------------------------------|-------------------|--------|----------------|----------------------------|----------------|--------------|------|-------|---------|-------|----------|--------|-------------------------|-------------------------|
|              |                                                                                | A29 genome        |        |                |                            |                |              |      |       |         |       |          |        |                         |                         |
| 108          | 2154783                                                                        | SNP in A29 genome |        | G              | T                          |                |              |      |       |         |       |          |        |                         |                         |
| 109          | 2156367                                                                        | SNP in A29 genome |        | C              | T                          |                |              |      |       |         |       |          |        |                         |                         |
| 110          | 2167776                                                                        | SNP in A29 genome |        | T              | C                          |                |              |      |       |         |       |          |        |                         |                         |
| 111          | 2194283                                                                        | SNP in A29 genome |        | A              | G                          |                |              |      |       |         |       |          |        |                         |                         |
| 112          | 2215118                                                                        | SNP in A29        |        | A              | G                          |                |              |      |       |         |       |          |        |                         |                         |

| Entry number | Start/Stop/SNP ( Numbering according to CP047022.1 , the Danish isolate genome | start/stop        | Strand | Danish isolate | SNP detected in A29 genome | Element symbol | Element name                          | Type   | Scope | Subtype | Class              | Subclass                     | Method | % Coverage of reference | % Identity to reference |
|--------------|--------------------------------------------------------------------------------|-------------------|--------|----------------|----------------------------|----------------|---------------------------------------|--------|-------|---------|--------------------|------------------------------|--------|-------------------------|-------------------------|
|              |                                                                                | genome            |        |                |                            |                |                                       |        |       |         |                    |                              |        |                         |                         |
| 113          | 2227623                                                                        | Start             | -      |                |                            | lmrS           | multidrug efflux MFS transporter LmrS | STRESS | plus  | BIOCIDE | MACROLIDE/PHENICOL | CHLORAMPHENICOL/ERYTHROMYCIN | BLASTP | 100                     | 99.38                   |
| 114          | 2229065                                                                        | stop              | -      |                |                            | lmrS           | multidrug efflux MFS transporter LmrS | STRESS | plus  | BIOCIDE | MACROLIDE/PHENICOL | CHLORAMPHENICOL/ERYTHROMYCIN | BLASTP | 100                     | 99.38                   |
| 115          | 2244000                                                                        | SNP in A29 genome |        | A              | G                          |                |                                       |        |       |         |                    |                              |        |                         |                         |
| 116          | 2259380                                                                        | SNP in A29 genome |        | G              | A                          |                |                                       |        |       |         |                    |                              |        |                         |                         |
| 117          | 2265353                                                                        | SNP in A29 genome |        | T              | G                          |                |                                       |        |       |         |                    |                              |        |                         |                         |
| 118          | 2306928                                                                        | SNP in            |        | A              | G                          |                |                                       |        |       |         |                    |                              |        |                         |                         |



| Entry number | Start/Stop/SNP ( Numbering according to CP047022.1 , the Danish isolate genome | start/stop        | Strand | Danish isolate | SNP detected in A29 genome | Element symbol | Element name | Type | Scope | Subtype | Class | Subclass | Method | % Coverage of reference | % Identity to reference |
|--------------|--------------------------------------------------------------------------------|-------------------|--------|----------------|----------------------------|----------------|--------------|------|-------|---------|-------|----------|--------|-------------------------|-------------------------|
|              |                                                                                | A29 genome        |        |                |                            |                |              |      |       |         |       |          |        |                         |                         |
| 119          | 2309738                                                                        | SNP in A29 genome |        | T              | C                          |                |              |      |       |         |       |          |        |                         |                         |
| 120          | 2318631                                                                        | SNP in A29 genome |        | T              | C                          |                |              |      |       |         |       |          |        |                         |                         |
| 121          | 2323985                                                                        | SNP in A29 genome |        | A              | G                          |                |              |      |       |         |       |          |        |                         |                         |
| 122          | 2326107                                                                        | SNP in A29 genome |        | T              | C                          |                |              |      |       |         |       |          |        |                         |                         |
| 123          | 2328991                                                                        | SNP in A29        |        | G              | A                          |                |              |      |       |         |       |          |        |                         |                         |

| Entry number | Start/Stop/SNP ( Numbering according to CP047022.1 , the Danish isolate genome | start/stop        | Strand | Danish isolate | SNP detected in A29 genome | Element symbol | Element name                                                      | Type | Scope | Subtype | Class      | Subclass   | Method   | % Coverage of reference | % Identity to reference |
|--------------|--------------------------------------------------------------------------------|-------------------|--------|----------------|----------------------------|----------------|-------------------------------------------------------------------|------|-------|---------|------------|------------|----------|-------------------------|-------------------------|
|              |                                                                                | genome            |        |                |                            |                |                                                                   |      |       |         |            |            |          |                         |                         |
| 124          | 2370143                                                                        | SNP in A29 genome |        | T              | C                          |                |                                                                   |      |       |         |            |            |          |                         |                         |
| 125          | 2371596                                                                        | Start             | +      |                |                            | fosB           | FosB1/FosB3 family fosfomycin resistance bacillithiol transferase | AMR  | core  | AMR     | FOSFOMYCIN | FOSFOMYCIN | PARTIALX | 74.82                   | 99.04                   |
| 126          | 2371907                                                                        | stop              | +      |                |                            | fosB           | FosB1/FosB3 family fosfomycin resistance bacillithiol transferase | AMR  | core  | AMR     | FOSFOMYCIN | FOSFOMYCIN | PARTIALX | 74.82                   | 99.04                   |
| 127          | 2387343                                                                        | SNP in A29 genome |        | A              | G                          |                |                                                                   |      |       |         |            |            |          |                         |                         |
| 128          | 2401737                                                                        | SNP in A29        |        | T              | G                          |                |                                                                   |      |       |         |            |            |          |                         |                         |

| Entry number | Start/Stope/SNP ( Numbering according to CP047022.1 , the Danish isolate genome | start/stop        | Strand | Danish isolate | SNP detected in A29 genome | Element symbol | Element name                                 | Type      | Scope | Subtype   | Class | Subclass | Method  | % Coverage of reference | % Identity to reference |
|--------------|---------------------------------------------------------------------------------|-------------------|--------|----------------|----------------------------|----------------|----------------------------------------------|-----------|-------|-----------|-------|----------|---------|-------------------------|-------------------------|
|              |                                                                                 | genome            |        |                |                            |                |                                              |           |       |           |       |          |         |                         |                         |
| 129          | 2427776                                                                         | SNP in A29 genome |        | A              | G                          |                |                                              |           |       |           |       |          |         |                         |                         |
| 130          | 2440156                                                                         | SNP in A29 genome |        | A              | G                          |                |                                              |           |       |           |       |          |         |                         |                         |
| 131          | 2444821                                                                         | SNP in A29 genome |        | C              | T                          |                |                                              |           |       |           |       |          |         |                         |                         |
| 132          | 2459283                                                                         | SNP in A29 genome |        | A              | G                          |                |                                              |           |       |           |       |          |         |                         |                         |
| 133          | 2462440                                                                         | Start             | +      |                |                            | hlgA           | bi-component gamma-hemolysin HlgAB subunit A | VIRULENCE | plus  | VIRULENCE |       |          | EXACT P | 100                     | 100                     |

| Entry number | Start/Stop/SNP ( Numbering according to CP047022.1 , the Danish isolate genome) | start/stop | Strand | Danish isolate | SNP detected in A29 genome | Element symbol | Element name                                       | Type       | Scope | Subtype    | Class | Subclass | Method  | % Coverage of reference | % Identity to reference |
|--------------|---------------------------------------------------------------------------------|------------|--------|----------------|----------------------------|----------------|----------------------------------------------------|------------|-------|------------|-------|----------|---------|-------------------------|-------------------------|
| 134          | 24633<br>69                                                                     | stop       | +      |                |                            | hlgA           | bi-component gamma-hemolysin HlgAB subunit A       | VIRULE NCE | plu s | VIRULE NCE |       |          | EXACT P | 100                     | 100                     |
| 135          | 24639<br>37                                                                     | Start      | +      |                |                            | hlgC           | bi-component gamma-hemolysin HlgCB subunit C       | VIRULE NCE | plu s | VIRULE NCE |       |          | BLAST P | 100                     | 97.46                   |
| 136          | 24648<br>84                                                                     | stop       | +      |                |                            | hlgC           | bi-component gamma-hemolysin HlgCB subunit C       | VIRULE NCE | plu s | VIRULE NCE |       |          | BLAST P | 100                     | 97.46                   |
| 137          | 24648<br>86                                                                     | Start      | +      |                |                            | hlgB           | bi-component gamma-hemolysin HlgAB/HlgCB subunit B | VIRULE NCE | plu s | VIRULE NCE |       |          | BLAST P | 100                     | 97.54                   |
| 138          | 24658<br>63                                                                     | stop       | +      |                |                            | hlgB           | bi-component gamma-hemolysin HlgAB/HlgCB subunit B | VIRULE NCE | plu s | VIRULE NCE |       |          | BLAST P | 100                     | 97.54                   |
| 139          | 24674<br>43                                                                     | SNP in     |        | C              | T                          |                |                                                    |            |       |            |       |          |         |                         |                         |

| Entry number | Start/Stop/SNP ( Numbering according to CP047022.1 , the Danish isolate genome | start/stop        | Strand | Danish isolate | SNP detected in A29 genome | Element symbol | Element name | Type | Scope | Subtype | Class | Subclass | Method | % Coverage of reference | % Identity to reference |
|--------------|--------------------------------------------------------------------------------|-------------------|--------|----------------|----------------------------|----------------|--------------|------|-------|---------|-------|----------|--------|-------------------------|-------------------------|
|              |                                                                                | A29 genome        |        |                |                            |                |              |      |       |         |       |          |        |                         |                         |
| 140          | 2473513                                                                        | SNP in A29 genome |        | T              | G                          |                |              |      |       |         |       |          |        |                         |                         |
| 141          | 2509534                                                                        | SNP in A29 genome |        | T              | C                          |                |              |      |       |         |       |          |        |                         |                         |
| 142          | 2578503                                                                        | SNP in A29 genome |        | C              | A                          |                |              |      |       |         |       |          |        |                         |                         |
| 143          | 2597962                                                                        | SNP in A29 genome |        | T              | C                          |                |              |      |       |         |       |          |        |                         |                         |
| 144          | 2607734                                                                        | SNP in A29        |        | C              | T                          |                |              |      |       |         |       |          |        |                         |                         |

| Entry number | Start/Stop/SNP ( Numbering according to CP047022.1 , the Danish isolate genome | start/stop        | Strand | Danish isolate | SNP detected in A29 genome | Element symbol | Element name                      | Type      | Scope | Subtype   | Class | Subclass | Method  | % Coverage of reference | % Identity to reference |
|--------------|--------------------------------------------------------------------------------|-------------------|--------|----------------|----------------------------|----------------|-----------------------------------|-----------|-------|-----------|-------|----------|---------|-------------------------|-------------------------|
|              |                                                                                | genome            |        |                |                            |                |                                   |           |       |           |       |          |         |                         |                         |
| 145          | 2618918                                                                        | SNP in A29 genome |        | C              | T                          |                |                                   |           |       |           |       |          |         |                         |                         |
| 146          | 2636282                                                                        | SNP in A29 genome |        | A              | G                          |                |                                   |           |       |           |       |          |         |                         |                         |
| 147          | 2649108                                                                        | SNP in A29 genome |        | G              | T                          |                |                                   |           |       |           |       |          |         |                         |                         |
| 148          | 2650162                                                                        | SNP in A29 genome |        | A              | G                          |                |                                   |           |       |           |       |          |         |                         |                         |
| 149          | 2702407                                                                        | Start             | -      |                |                            | aur            | zinc metalloproteinase aureolysin | VIRULENCE | plus  | VIRULENCE |       |          | BLAST P | 100                     | 99.41                   |

| Entry number | Start/Stop/SNP ( Numbering according to CP047022.1 , the Danish isolate genome | start/stop        | Strand | Danish isolate | SNP detected in A29 genome | Element symbol | Element name                                                          | Type      | Scope | Subtype   | Class | Subclass | Method | % Coverage of reference | % Identity to reference |
|--------------|--------------------------------------------------------------------------------|-------------------|--------|----------------|----------------------------|----------------|-----------------------------------------------------------------------|-----------|-------|-----------|-------|----------|--------|-------------------------|-------------------------|
| 150          | 2703936                                                                        | stop              | -      |                |                            | aur            | zinc metalloproteinase aureolysin                                     | VIRULENCE | plus  | VIRULENCE |       |          | BLASTP | 100                     | 99.41                   |
| 151          | 2703979                                                                        | SNP in A29 genome |        | G              | A                          |                |                                                                       |           |       |           |       |          |        |                         |                         |
| 152          | 2743489                                                                        | SNP in A29 genome |        | G              | A                          |                |                                                                       |           |       |           |       |          |        |                         |                         |
| 153          | 2747266                                                                        | Start             | +      |                |                            | icaC           | polysaccharide intercellular adhesin biosynthesis/export protein IcaC | VIRULENCE | plus  | VIRULENCE |       |          | EXACTP | 100                     | 100                     |
| 154          | 2748318                                                                        | stop              | +      |                |                            | icaC           | polysaccharide intercellular adhesin biosynthesis/export protein IcaC | VIRULENCE | plus  | VIRULENCE |       |          | EXACTP | 100                     | 100                     |
| 155          | 2748508                                                                        | SNP in            |        | A              | C                          |                |                                                                       |           |       |           |       |          |        |                         |                         |

| Entry number | Start/Stop/SNP ( Numbering according to CP047022.1 , the Danish isolate genome | start/stop        | Strand | Danish isolate | SNP detected in A29 genome | Element symbol | Element name         | Type       | Scope | Subtype    | Class | Subclass | Method  | % Coverage of reference | % Identity to reference |
|--------------|--------------------------------------------------------------------------------|-------------------|--------|----------------|----------------------------|----------------|----------------------|------------|-------|------------|-------|----------|---------|-------------------------|-------------------------|
|              |                                                                                | A29 genome        |        |                |                            |                |                      |            |       |            |       |          |         |                         |                         |
| 156          | 2758689                                                                        | SNP in A29 genome |        | C              | A                          |                |                      |            |       |            |       |          |         |                         |                         |
| 157          | 2769798                                                                        | Start             | -      |                |                            | cna            | collagen adhesin Cna | VIRULE NCE | plus  | VIRULE NCE |       |          | BLAST P | 100                     | 98.22                   |
| 158          | 2771818                                                                        | SNP in A29 genome |        | A              | G                          |                |                      |            |       |            |       |          |         |                         |                         |
| 159          | 2773349                                                                        | stop              | -      |                |                            | cna            | collagen adhesin Cna | VIRULE NCE | plus  | VIRULE NCE |       |          | BLAST P | 100                     | 98.22                   |
